# Supplementary material for: Soft Sensor-Based Monitoring and Efficient Control Strategies of Biomass Concentration for Continuous Cultures of Haloferax mediterranei and Their Application to an Industrial Production Chain
Source: PubMed Central journal article supplement (PMC6956367; doi:10.3390/microorganisms7120648), 2019-12-04
Supplement: microorganisms-07-00648-s001.pdf [file microorganisms-07-00648-s001.pdf]

## Supplementary material

In this file, equations are provided which were used, but not presented in the recent study.

Equations A1 to A3 represent the equation system for rate calculation in a matrix form. Due to noise in the measurements a residuals vector  $\varepsilon$  needs to be introduced (Equation A4). Measurements for DoR and C balance without significant errors should therefore show residuals not statistically different from zero, indicated by the statistical test value  $h$ , a measure for the deviation of the residuals (Equation A5 and A6). The variance-covariance matrix of the residuals ( $\Phi$ ) is calculated with Equation A6, including the variance-covariance matrix of the rates ( $\Psi$ ). The errors for the rates were assumed to be 10% (Equation A7).

The biomass yield  $Y_{X/S}$  is determined according to Equation A8.

The specific growth rate  $\mu$  can be calculated online using Equation A9 and yields for the formation of CO<sub>2</sub> and consumption of O<sub>2</sub> is calculated using Equation A10 and A11.

|                                                                                                                                                                                                                                         |       |
|-----------------------------------------------------------------------------------------------------------------------------------------------------------------------------------------------------------------------------------------|-------|
| $EW = 0$                                                                                                                                                                                                                                | (A1)  |
| $E = \begin{pmatrix} 1 & 1 & 0 & -1 & -1 \\ \gamma_{Gly} & \gamma_{For} & \gamma_{O2} & \gamma_{CO2} & -\gamma_X \end{pmatrix}$                                                                                                         | (A2)  |
| $W = \begin{pmatrix} r_{S,Gly} \\ r_{S,For} \\ OUR \\ CER \\ r_X \end{pmatrix}$                                                                                                                                                         | (A3)  |
| $EW = \varepsilon$                                                                                                                                                                                                                      | (A4)  |
| $h = \varepsilon^T \Phi^{-1} \varepsilon$                                                                                                                                                                                               | (A5)  |
| $\Phi = E^T \Psi E$                                                                                                                                                                                                                     | (A6)  |
| $\Psi = \begin{pmatrix} e_{gly} & 0 & 0 & 0 \\ 0 & e_{for} & 0 & 0 \\ 0 & 0 & e_{O2} & 0 \\ 0 & 0 & 0 & e_{CO2} \end{pmatrix} = \begin{pmatrix} 0.1 & 0 & 0 & 0 \\ 0 & 0.1 & 0 & 0 \\ 0 & 0 & 0.1 & 0 \\ 0 & 0 & 0 & 0.1 \end{pmatrix}$ | (A7)  |
| $Y_{X/S} = \frac{r_X}{r_S}$                                                                                                                                                                                                             | (A8)  |
| $\mu = \frac{r_X}{X \cdot M_X}$                                                                                                                                                                                                         | (A9)  |
| $Y_{CO2/S} = \frac{CER}{r_S}$                                                                                                                                                                                                           | (A10) |

$$Y_{O_2/S} = \frac{OUR}{r_s}$$

(A11)
